# Supplementary material for: Developing a triple helix approach for CO2 utilisation assessment
Source: Royal Society of Chemistry journal article supplement (doi:10.1039/d1fd00002k), 2021-01-01
Supplement: d1fd00002k1.pdf [file d1fd00002k1.pdf]

## Supplementary information to “Developing a Triple Helix Approach for CO<sub>2</sub> Utilisation Assessment”

Stephen McCord,<sup>a</sup> Katy Armstrong<sup>a</sup> and Peter Styring<sup>a\*</sup>

<sup>a</sup> UK Centre for Carbon Dioxide Utilisation, Department of Chemical & Biological Engineering, University of Sheffield, Sir Robert Hadfield Building, Sheffield, S1 3JD, United Kingdom

Table 1 ESI Selected subcategories and their application to CDU social impact assessment (full framework)

| Stakeholder     | UNEP subcategory             | Aims of UNEP subcategory assessment                                                                                        | Relevance to identified CDU assessment scope                                                                                                                                                                                                                                                                                                                                                                             | Suggested indicator(s)                                       | Typical data inputs used for assessing indicator                                                                                                   | Suggested external data sources                                                                              |
|-----------------|------------------------------|----------------------------------------------------------------------------------------------------------------------------|--------------------------------------------------------------------------------------------------------------------------------------------------------------------------------------------------------------------------------------------------------------------------------------------------------------------------------------------------------------------------------------------------------------------------|--------------------------------------------------------------|----------------------------------------------------------------------------------------------------------------------------------------------------|--------------------------------------------------------------------------------------------------------------|
| Local Community | Delocalisation & migration   | Assess the contribution to delocalization, migration or ‘involuntary resettlement’ within communities                      | Changes in land use at scale for economic development can be a driving factor in the creation of displaced persons                                                                                                                                                                                                                                                                                                       | Likelihood of forced evictions for technology implementation | Process design calculations, LCI data, geographical data (land use), regional/national data on forced resettlement/compulsory purchase orders etc. | OECD land resources statistics                                                                               |
|                 | Local employment             | Assesses how an organization directly or indirectly affects local employment.                                              | CDU technologies could bring changes to employment opportunities both directly & indirectly, more so if the supply chain is localised                                                                                                                                                                                                                                                                                    | Operational impact on local employment - direct              | Process design calculations, labour estimation calculations, employment & labour statistics                                                        | World Bank development indicators (employment), national employment & labour statistics                      |
|                 |                              |                                                                                                                            |                                                                                                                                                                                                                                                                                                                                                                                                                          | Operational impact on local employment - indirect            | Employment & labour statistics, IRENA employment statistics, COMTRADE-type data                                                                    | World Bank development indicators (employment), national employment & labour statistics                      |
|                 | Access to material resources | Assess the extent to which organizations respect/protect/ improve community access to material resources & infrastructure. | CDU technologies can impact positively & negatively access to resources such as (renewable) electricity, water, land & other products. Additional strains on areas known to be water/land/energy (renewable & not) constrained may cause problems for communities. Operations may also impact access to material produce negatively (consuming limited resources) or positively (increasing domestic security of supply) | Operational impact on local land-use & zoning                | Process design calculations, LCI data, geographical data (land use)                                                                                | OECD land resources statistics                                                                               |
|                 |                              |                                                                                                                            |                                                                                                                                                                                                                                                                                                                                                                                                                          | Changes to local water supply & security                     | Process design calculations, LCI data, water scarcity data for country/region                                                                      | UN AQUASTAT database, national reports/statistics (regional perspective)                                     |
|                 |                              |                                                                                                                            |                                                                                                                                                                                                                                                                                                                                                                                                                          | Changes to local electricity & energy supply                 | Process design calculations, LCI data, national electricity/energy statistics (e.g, DUKES)                                                         | World bank WDI & SE4ALL databases, national reports/statistics on electricity & energy consumption/provision |
|                 |                              |                                                                                                                            |                                                                                                                                                                                                                                                                                                                                                                                                                          | Changes to local access to material produce                  | COMTRADE-type data & national production/market statistics                                                                                         | UN COMTRADE, EU PRODCOM & OECD databases,                                                                    |

|                    |                                  |                                                                                                                                      |                                                                                                                                                                                                                                |                                                                                      |                                                                                                   |                                                                                   |
|--------------------|----------------------------------|--------------------------------------------------------------------------------------------------------------------------------------|--------------------------------------------------------------------------------------------------------------------------------------------------------------------------------------------------------------------------------|--------------------------------------------------------------------------------------|---------------------------------------------------------------------------------------------------|-----------------------------------------------------------------------------------|
|                    |                                  |                                                                                                                                      |                                                                                                                                                                                                                                |                                                                                      |                                                                                                   | Observatory of economic complexity data                                           |
|                    | Safe & healthy living conditions | Assess how organizations impact community safety & health                                                                            | Potential risks and benefits of CDU plant operation on the communities safety & health should be assessed to determine potential impacts on the local community (considering both regular operation & accident potential)      | Impact on air quality & pollution levels                                             | Process design calculations, LCI data                                                             | World Bank WDI database                                                           |
|                    |                                  |                                                                                                                                      |                                                                                                                                                                                                                                | Utilisation & risks associated with the use of hazardous substances in the operation | Chemical safety data, LCI data, HAZOP studies                                                     | COSHH database, ILO International Chemicals Safety Cards database                 |
| Value Chain Actors | Promoting social responsibility  | Assess whether the organisation promotes social responsibility through its actions & among its suppliers                             | Choices made in technology development/deployment may have unintended impacts on value chains and communities involved in these chains. CDU processes offer the potential to utilise 'waste' streams                           | Potential for and impact of integration of waste materials into the supply chain     | LCI data                                                                                          | LCI databases                                                                     |
|                    |                                  |                                                                                                                                      |                                                                                                                                                                                                                                | Risk of utilisation of illicit or conflict materials within supply chain             | LCI data, COMTRADE-type data & national production/market statistics                              | UN COMTRADE, EU PRODCOM & OECD databases, Observatory of economic complexity data |
| Consumers          | Consumer health & safety         | Assess the existence & scope of systematic efforts to address consumer health & safety across the life cycle                         | Whilst always beneficial, assessing risks to the H&S of consumers is of particular importance if a new CDU product fulfils the same function of an existing product whilst being chemically non identical – e.g. DME as a fuel | Consumer health & safety risk                                                        | Process design calculations, LCI data, Chemical safety data                                       | COSHH database, ILO International Chemicals Safety Cards database                 |
|                    | End of life (EoL) responsibility | Assess management efforts to address the social impacts of product or service end-of-life                                            | Understanding EoL protocol (ease of recyclability/recovery/disposal) is important as an element of the circular economy. Also of interest is the potential impact on health for improper disposal                              | Recyclability of product & process elements                                          | Process design calculations, LCI data                                                             | LCI databases                                                                     |
| Workers            | Child labour                     | Assess whether the organization is employing child labour as defined by ILO conventions & to identify the nature of any child labour | Choices made in technology development/deployment may have unintended consequences regarding child labour utilisation                                                                                                          | Potential for utilization of child labour in supply chain                            | Process design calculations, LCI data, COMTRADE-type data & national production/market statistics | UN COMTRADE, EU PRODCOM & OECD databases, Observatory of economic complexity data |
|                    | Forced Labour                    | Assess whether there is the use of forced labour in the organization                                                                 | Choices made in technology development/deployment may have unintended consequences regarding forced labour utilisation                                                                                                         | Potential for utilization of forced labour in supply chain                           | Process design calculations, LCI data, COMTRADE-type data & national production/market statistics | UN COMTRADE, EU PRODCOM & OECD databases, Observatory of economic complexity data |
|                    | Equal Opportunities              | Assess whether there is any worker                                                                                                   | Choices made in technology                                                                                                                                                                                                     | Potential for supporting                                                             | Process design calculations, LCI data,                                                            | UN COMTRADE, EU PRODCOM                                                           |

|         |                                            |                                                                                                                                  |                                                                                                                                           |                                                                                           |                                                                                   |                                                                                   |
|---------|--------------------------------------------|----------------------------------------------------------------------------------------------------------------------------------|-------------------------------------------------------------------------------------------------------------------------------------------|-------------------------------------------------------------------------------------------|-----------------------------------------------------------------------------------|-----------------------------------------------------------------------------------|
|         |                                            | discrimination present in the organization                                                                                       | development/deployment may have unintended consequences regarding workplace discrimination                                                | discriminatory practices in supply chain                                                  | COMTRADE-type data & national production/market statistics                        | & OECD databases, Observatory of economic complexity data                         |
|         | Worker H&S                                 | Assess the rate of workplace incidents and prevention/management processes                                                       | It is widely understood there is a need to assess potential H&S risks in manufacturing                                                    | Risk to the H&S of workers associated with operation                                      | ILO data on national workplace accident rate, HAZOP studies, chemical safety data | COSHH database, ILO International Chemicals Safety Cards database, ILO H&S data   |
| Society | Public commitment to sustainability issues | Assess to what extent the organization is engaged in reducing its 'sustainability impacts' – including public & internal targets | This indicator has been changed to consider societal commitment to sustainable development                                                | Societal & political support for sustainability initiatives that may impact the operation | IRENA energy profiles, UN SDG index scores                                        | IRENA energy profiles, SDG index scores                                           |
|         | Prevention & mitigation of conflicts       | Assess the organizations role in conflicts or situations that may lead to conflict (violent & non-violent)                       | Technologies have the potential to contribute to conflict instigation through the use of materials and labour along the supply chain      | Risk of utilising of goods/materials/services from areas of conflict                      | LCI data, COMTRADE-type data & national production/market statistics              | UN COMTRADE, EU PRODCOM & OECD databases, Observatory of economic complexity data |
|         | Contribution to economic development       | Assess to what extent the organization/product/service contributes to the economic development of the country                    | Technologies & development choices have the potential to aid (or hinder) in contributing to economic development beyond local communities | Utilisation of national supply chains over international                                  | LCI data, COMTRADE-type data & national production/market statistics              | UN COMTRADE, EU PRODCOM & OECD databases, Observatory of economic complexity data |

Table 2 EIS: Inventory Data for CDU and Sub-processes

| Item               | Amine CC for 1 t CO <sub>2</sub> / <sup>1,2</sup>                         | Hydrogen for 1 t/h <sup>3</sup> | Wind per 1 kWh <sup>4</sup> | Solar per 1 kWh <sup>4</sup>                    | Methanol 1 t/h <sup>3</sup>                  | Polymers 1 t <sup>5</sup>                                   | Mineralisation per kg carbonated block <sup>6</sup> |
|--------------------|---------------------------------------------------------------------------|---------------------------------|-----------------------------|-------------------------------------------------|----------------------------------------------|-------------------------------------------------------------|-----------------------------------------------------|
| <b>Electricity</b> | 36-202 kWh/t depending on if CHP available                                | 52 MW                           | -                           | -                                               | 0.17 MWh                                     | 0.01 kwh/kg polyol                                          | 0.03 kWh/kg                                         |
| <b>Heat</b>        | Steam 3.7-4.4 GJ or 3.6 GJ from Nat Gas if CHP                            | -                               | -                           | -                                               | 0.44 MWh, saturated steam 25bar              | 0.05 kg steam/kg polyol = 0.14 MJ/kg                        | 0.06 KWh/kg thermal heat                            |
| <b>Water</b>       | Water needed for amine make up, washing and cooling recycling system used | 9.4 t/h deionised water         | 1 kg/kWh                    | Average 0.9 kg/kWh to max 4 kg/kWh <sup>7</sup> | 4.4 t/h cooling water, 0.03 t/h boiler water | 1.14 kg/kg polypol cooling, 0.55 kg/kg polyol chilled water | 0.11 kg/kg                                          |

|                       |                                                                                |                                                                           |                                              |                                                                              |                                                                                                                            |                                                                                                                                                           |                                                                              |
|-----------------------|--------------------------------------------------------------------------------|---------------------------------------------------------------------------|----------------------------------------------|------------------------------------------------------------------------------|----------------------------------------------------------------------------------------------------------------------------|-----------------------------------------------------------------------------------------------------------------------------------------------------------|------------------------------------------------------------------------------|
| <b>Raw materials</b>  | Amines needed for capture                                                      | Pt or Pd Cathode, IrO <sub>2</sub> or RuO <sub>2</sub> anode <sup>8</sup> | -                                            | Several toxic, flammable and explosive chemicals associated with manufacture | 0.102 kg/h catalyst Cu/ZnO/Al <sub>2</sub> O <sub>3</sub> , 1.46 t CO <sub>2</sub> /t MeOH, 0.199 t H <sub>2</sub> /t MeOH | PO 0.81kh/kg polyol (0.16 less than conventional) all other feeds same as conventional, 0.23 kg CO <sub>2</sub> /kg polyol, double metal cyanide catalyst | 0.48 kg sand/kg and 0.48 kg stainless steel slag, 0.09kg CO <sub>2</sub> /kg |
| <b>Wastes</b>         | -                                                                              | 0.45 t/h waste water                                                      | -                                            |                                                                              | 0.56 t/h                                                                                                                   | -                                                                                                                                                         | 0.09 kg waste water/kg                                                       |
| <b>Emissions</b>      | 1.5 kg MEA per ton CO <sub>2</sub> captured to flue gas, water and degradation | -                                                                         | 25 g CO <sub>2</sub> /kWh minor noise issues | 90 g CO <sub>2</sub> /kwh                                                    | 0.077 t/h CO <sub>2</sub>                                                                                                  | No delta from reference. Lower CO <sub>2</sub> emission.                                                                                                  | Unknown                                                                      |
| <b>Land</b>           | -                                                                              | Small for plant, large for electricity                                    | 44.7 acres/MW                                | 6.1 acres/MW issues with land competition for siting solar farms             | -                                                                                                                          | -                                                                                                                                                         | -                                                                            |
| <b>H&amp;S issues</b> | -                                                                              | H <sub>2</sub> storage                                                    | Bird strikes                                 | -                                                                            | -                                                                                                                          | -                                                                                                                                                         | -                                                                            |

Table 3 EIS Full Impact calculation table for Methanol in 3 locations

| Subcategory                           | Indicator                                                    | Data Calculation method and Data sources                                                                                                                         | Scoring method                                                                        | MeOH UK Wind | MeOH UK Solar | MeOH China Wind | MeOH China Solar | MeOH Chile Wind | MeOH Chile Solar | Justification                                                                                                                                                                 |
|---------------------------------------|--------------------------------------------------------------|------------------------------------------------------------------------------------------------------------------------------------------------------------------|---------------------------------------------------------------------------------------|--------------|---------------|-----------------|------------------|-----------------|------------------|-------------------------------------------------------------------------------------------------------------------------------------------------------------------------------|
| <b>Delocalisation &amp; migration</b> | Likelihood of forced evictions for technology implementation | Calculate land area needed (factor in electricity source if dedicated), web search for history of forced evictions/compulsory purchases etc. to factor into risk | 0 = no risk<br>1 = low risk<br>2 = med risk<br>3 = high risk<br>4 = very high risk    | 0            | 0             | 1               | 2                | 1               | 1                | Reasonably low risk of displacement for economic development, wind needs larger area though likely offshore. Forced eviction most prevalent in Asia followed by Latin America |
| <b>Local employment</b>               | Locals directly employed due to activity                     | Process data & calculations, estimation from NOL for operators, local unemployment figures, average salary in                                                    | 0 = numerous, above local average pay jobs created<br>1 = high number of jobs created | 1            | 0             | 1               | 0                | 1               | 0                | Higher job creation in solar energy than wind (x2-3 times greater per MW)                                                                                                     |

|                                                  |                                                     |                                                                                                                                                                                                                                        |                                                                                                                                                                        |   |   |   |   |   |   |                                                                                                                                                                                                                                                                       |
|--------------------------------------------------|-----------------------------------------------------|----------------------------------------------------------------------------------------------------------------------------------------------------------------------------------------------------------------------------------------|------------------------------------------------------------------------------------------------------------------------------------------------------------------------|---|---|---|---|---|---|-----------------------------------------------------------------------------------------------------------------------------------------------------------------------------------------------------------------------------------------------------------------------|
|                                                  |                                                     | region vs average salary of plant operator in region                                                                                                                                                                                   | 2 = medium level of jobs created<br>3 = low level of jobs created<br>4 = no benefit to local pop – zero jobs                                                           |   |   |   |   |   |   |                                                                                                                                                                                                                                                                       |
|                                                  | Locals indirectly employed due to activity          | IRENA employment calculations, COMTRADE/BP to check if process inputs can be sourced locally                                                                                                                                           | 0= highly localized supply chain<br>1 = predominately local supply chain<br>2 = mixed location supply chain<br>3 = mainly international supply chain<br>4 = no benefit | 1 | 1 | 1 | 1 | 1 | 1 | Localised supply apart from catalysts                                                                                                                                                                                                                                 |
| <b>Access to MR</b>                              | Changes to local land use                           | Calculate land area needed (factor in electricity source if dedicated) and consideration for how much space is available                                                                                                               | 0=minimal issues<br>1= low<br>2= moderate<br>3=high<br>4=Significant issues                                                                                            | 1 | 4 | 2 | 1 | 2 | 1 | China and Chile have considerable prospects for solar deployment. UK has access to large wind resources, though land for solar an issue                                                                                                                               |
|                                                  | Changes to local water supply & security            | <a href="https://worldwater.io/">https://worldwater.io/</a><br>Consideration of water scarcity within the country compared to amount of water needed for production                                                                    | 0=minimal issues<br>1= low<br>2= moderate<br>3=high<br>4=Significant issue                                                                                             | 2 | 2 | 1 | 2 | 2 | 2 | China has low level of people living in water scarce areas (36%)<br>UK and Chile are higher (46% and 52% respectively).                                                                                                                                               |
|                                                  | Changes to local electricity supply                 | <a href="https://www.irena.org/Statistics/Statistical-Profiles">https://www.irena.org/Statistics/Statistical-Profiles</a><br>Consideration of amount electricity needed per FU and amount of solar or wind energy produced per country | 0=minimal issues with capacity (or dedicated supply)<br>1= low with capacity<br>2= moderate with capacity<br>3=high with capacity<br>4=Significant issue with capacity | 2 | 3 | 1 | 1 | 4 | 3 | Electricity demand for MeOH production is high due to water electrolysis for H <sub>2</sub> . China has least capacity issues, UK wind has greater potential for expansion. Solar & wind capacity are small in Chile, where hydro is dominant renewable energy source |
|                                                  | Changes to local access to material produced        | <a href="https://comtrade.un.org/">https://comtrade.un.org/</a><br>Consideration of how much methanol is imported and exported                                                                                                         | 0= very high change<br>1= high significant change<br>2= moderate change<br>3=small change<br>4=no change                                                               | 2 | 2 | 2 | 2 | 4 | 4 | Chile exports large amount of methanol. UK and China import more methanol than they export so this will increase local security of supply.                                                                                                                            |
| <b>Safe &amp; Healthy Living conditions (LC)</b> | Impact on air quality/pollution levels - production | <a href="http://wdi.worldbank.org/table/WV.3">http://wdi.worldbank.org/table/WV.3</a><br>Using the air pollution data per country and adding possible additional air pollution from process                                            | 0= no/positive impact<br>1 = low impact<br>2 = medium impact<br>3 = high impact<br>4 = very high impact                                                                | 0 | 0 | 2 | 2 | 1 | 1 | Air pollution is worst in China and best in UK. The amines from the capture process will add to local air pollution.                                                                                                                                                  |
|                                                  | Utilisation of hazardous substances in              | Consideration of the hazards created raw materials used in process, storage and transportation of product. Use of Hazop                                                                                                                | 0= no impact<br>1 = low impact<br>2 = medium impact                                                                                                                    | 2 | 2 | 2 | 2 | 2 | 2 | Use of amines and H <sub>2</sub> (H <sub>2</sub> needs storage)                                                                                                                                                                                                       |

|                                        |                                                                            |                                                                                                                                                                                                                                                                                  |                                                                                                                                                                                                                                         |   |   |   |   |   |   |                                                                                                                                                                         |
|----------------------------------------|----------------------------------------------------------------------------|----------------------------------------------------------------------------------------------------------------------------------------------------------------------------------------------------------------------------------------------------------------------------------|-----------------------------------------------------------------------------------------------------------------------------------------------------------------------------------------------------------------------------------------|---|---|---|---|---|---|-------------------------------------------------------------------------------------------------------------------------------------------------------------------------|
|                                        | process                                                                    | data for materials.                                                                                                                                                                                                                                                              | 3 = high impact<br>4 = very high impact                                                                                                                                                                                                 |   |   |   |   |   |   |                                                                                                                                                                         |
| <b>Promoting social responsibility</b> | Use of wastes and other sustainably materials                              | Consideration of how many raw material as sourced from waste or are sustainable                                                                                                                                                                                                  | 0= very high use of sustainable/wastes<br>1 = high use<br>2 = medium use<br>3 = low use<br>4 = no use/unstable                                                                                                                          | 1 | 1 | 1 | 1 | 1 | 1 | Inputs are sustainable as renewable H <sub>2</sub> production is used, however electrodes use platinum group metals                                                     |
|                                        | Social responsibility in supply chain                                      | Risk of utilisation of illicit or conflict materials within supply chain<br><a href="https://www.usgs.gov/centers/nmic/platinum-group-metals-statistics-and-information">https://www.usgs.gov/centers/nmic/platinum-group-metals-statistics-and-information</a>                  | 0= no risk<br>1 = low risk<br>2 = medium risk<br>3 = high risk<br>4 = very high risk                                                                                                                                                    | 1 | 1 | 1 | 1 | 1 | 1 | Platinum group metals used but sustainable reporting is common for the metals therefore sustainably producer could be chosen                                            |
| <b>Consumer health &amp; safety</b>    | Consumer health & safety risk                                              | Consideration as to whether product poses any consumer H&S issues. Data from COSHH                                                                                                                                                                                               | 0= no risk<br>1 = low risk<br>2 = medium risk<br>3 = high risk<br>4 = very high risk                                                                                                                                                    | 2 | 2 | 2 | 2 | 2 | 2 | Methanol predominantly used in industry rather than by consumers, however poses acute health hazards for oral , dermal and inhalation toxicity and is highly flammable. |
| <b>EOL responsibility</b>              | Recyclability of product & process elements                                | Consideration of raw materials, wastes and products in respect to their ability to be recycled. Consideration of ease of recycling.                                                                                                                                              | 0= no impact/ easily fully recyclable<br>1 = low impact/some issues recycling<br>2 = medium impact/ recycling + end of life pyrolysis/energy recovery<br>3 = high impact/ recycling via DAC<br>4 = very high impact/ cannot be recycled | 3 | 3 | 3 | 3 | 3 | 3 | Methanol is not a product able to be recycled directly is going to emit CO <sub>2</sub> , can be recycled by air capture of CO <sub>2</sub>                             |
|                                        | Potential health risks for improper disposal of product & process elements | Potential impact on health, data from knowledge of process elements and product disposal.                                                                                                                                                                                        | 0= no impact<br>1 = low impact<br>2 = medium impact<br>3 = high impact<br>4 = very high impact                                                                                                                                          | 1 | 1 | 1 | 1 | 1 | 1 | No issues for product disposal, high use of electrolyzers for H <sub>2</sub> = disposal of used electrodes                                                              |
| <b>Child labour</b>                    | Potential for utilization of child labour in supply chain                  | <a href="http://wdi.worldbank.org/table/2.6">http://wdi.worldbank.org/table/2.6</a><br>Likelihood that their might be child labour occurring in supply chain and scenario country                                                                                                | 0= no likelihood<br>1 = low likelihood<br>2 = medium likelihood<br>3 = high likelihood<br>4 = very high likelihood                                                                                                                      | 0 | 0 | 0 | 0 | 1 | 1 | Chile has low levels of child labour though these are mainly concentrated in the services and agricultural industries.                                                  |
| <b>Forced labour</b>                   | Potential for utilization of forced labour in supply chain                 | Consideration of likelihood of forced labour in supply chain and impact<br><a href="http://ilo.org/wcmsp5/groups/public/@dgreports/@dcomm/documents/publication/wcms_575479.pdf">http://ilo.org/wcmsp5/groups/public/@dgreports/@dcomm/documents/publication/wcms_575479.pdf</a> | 0= no likelihood<br>1 = low likelihood<br>2 = medium likelihood<br>3 = high likelihood<br>4 = very high likelihood                                                                                                                      | 1 | 1 | 1 | 1 | 1 | 1 | Higher risk in Africa, Asia and Pacific. Metal catalysts likely to be sourced from Africa however quantities needed are low.                                            |

|                                                   |                                                                   |                                                                                                                                                                                                                                                                                                                                                     |                                                                                                                                                 |   |   |   |   |   |   |                                                                                                                                                        |
|---------------------------------------------------|-------------------------------------------------------------------|-----------------------------------------------------------------------------------------------------------------------------------------------------------------------------------------------------------------------------------------------------------------------------------------------------------------------------------------------------|-------------------------------------------------------------------------------------------------------------------------------------------------|---|---|---|---|---|---|--------------------------------------------------------------------------------------------------------------------------------------------------------|
| <b>Equal Opportunities</b>                        | Potential for supporting discriminatory practices in supply chain | Labour force participation rate in the country. Data from World Bank regarding employment in location.                                                                                                                                                                                                                                              | 0= no likelihood of supporting discrimination<br>1 = low likelihood<br>2 = medium likelihood<br>3 = high likelihood<br>4 = very high likelihood | 0 | 0 | 1 | 1 | 0 | 0 | UK and Chile have high levels of female employment. China has much lower levels of employment which could lead to discriminatory practice.             |
| <b>Worker health &amp; safety</b>                 | Worker health & safety risk                                       | Country H&S data and consideration of process<br><a href="https://ilostat.ilo.org/topics/safety-and-health-at-work/">https://ilostat.ilo.org/topics/safety-and-health-at-work/</a>                                                                                                                                                                  | 0= no impact<br>1 = low impact<br>2 = medium impact<br>3 = high impact<br>4 = very high impact                                                  | 2 | 2 | 2 | 2 | 3 | 3 | H <sub>2</sub> storage & transportation and possible exposure to amines are biggest issues regarding H&S. UK has a better H&S Chile. Unknown for China |
| <b>Public commitment to sustainability issues</b> |                                                                   | Irena Energy profiles, commitment to renewable energy targets and frequency of environmental policy<br><a href="http://solability.com/the-global-sustainable-competitiveness-index/the-index">http://solability.com/the-global-sustainable-competitiveness-index/the-index</a><br><a href="https://www.sdgindex.org/">https://www.sdgindex.org/</a> | 0= very high<br>1 = high commitment<br>2 = medium commitment<br>3 = low commitment<br>4 = no commitment                                         | 1 | 1 | 2 | 2 | 2 | 2 | Chile has very high renewable energy targets, but with China is lower in the Global sustainable competitiveness ranking than UK                        |
| <b>Prevention &amp; mitigation of conflicts</b>   | Potential for utilisation of goods/materials/services             | Consideration of sources of raw materials for the process. Are these from areas with conflict or could alternative sourcing contribute to mitigation?                                                                                                                                                                                               | 0= no impact<br>1 = low impact<br>2 = medium impact<br>3 = high impact<br>4 = very high impact                                                  | 1 | 1 | 1 | 1 | 1 | 1 | All countries would likely be sourcing metals externally therefore rankings similar.                                                                   |
| <b>Contribution to economic development</b>       | Use of local supply chain                                         | How many raw materials can be sourced local reducing demand for imports and therefore increasing local economy.                                                                                                                                                                                                                                     | 0= very high use<br>1 = high use<br>2 = medium use<br>3 = low use<br>4 = no use                                                                 | 1 | 1 | 1 | 1 | 1 | 1 | Raw materials apart from metals can all be sourced locally, only CO <sub>2</sub> and water required.                                                   |

Table 4 EIS Full Impact calculation table for comparison of methanol, polymers and minerals via CDU in UK scenario

| Subcategory                           | Indicator                                                          | Data Calculation method and Data sources                                                                                                                                                                                               | Scoring method – where 2 scoring methods are given, average of both scores is calculated                                                                                                              | MeOH UK Wind | MeOH UK Solar | Polymer UK Wind | Polymer UK Solar | Mineral UK Wind | Mineral UK Solar | Justification                                                                                                                                                    |
|---------------------------------------|--------------------------------------------------------------------|----------------------------------------------------------------------------------------------------------------------------------------------------------------------------------------------------------------------------------------|-------------------------------------------------------------------------------------------------------------------------------------------------------------------------------------------------------|--------------|---------------|-----------------|------------------|-----------------|------------------|------------------------------------------------------------------------------------------------------------------------------------------------------------------|
| <b>Delocalisation &amp; migration</b> | Likelihood of local forced evictions for technology implementation | Calculate land area needed (factor in electricity source if dedicated), web search for history of forced evictions/compulsory purchases etc to factor into risk                                                                        | 0 = no risk<br>1 = low risk<br>2 = med risk<br>3 = high risk<br>4 = very high risk                                                                                                                    | 0            | 0             | 0               | 0                | 0               | 0                | Highly unlikely in UK scenario, most land used for MeOH solar but this likely to be agricultural land                                                            |
| <b>Local employment</b>               | Locals directly employed due to activity                           | Process data & calculations, estimation from NOL for operators, local unemployment figures, average salary in region vs average salary of plant operator in region                                                                     | 0 = numerous, above local average pay jobs created<br>1 = high number of jobs created<br>2 = medium level of jobs created<br>3 = low level of jobs created<br>4 = no benefit to local pop – zero jobs | 1            | 0             | 3               | 3                | 3               | 3                | Higher job creation in solar energy than wind (x2-3 times greater per MW), however polymer and minerals use much lower levels of renewable energy therefore just |
|                                       | Locals indirectly employed due to activity                         | IRENA employment calculations, COMTRADE/BP to check if process inputs can be sourced locally                                                                                                                                           | 0= highly localized supply chain<br>1 = predominately local supply chain<br>2 = mixed location supply chain<br>3 = mainly international supply chain<br>4 = no benefit                                | 1            | 1             | 1               | 1                | 0               | 0                | Localised apart from catalysts, for mineralisation use of waste local materials                                                                                  |
| <b>Access to MR</b>                   | Changes to local land use                                          | Calculate land area needed (factor in electricity source if dedicated) and consideration for how much space is available                                                                                                               | 0=minimal issues<br>1= low<br>2= moderate<br>3=high<br>4=Significant issues                                                                                                                           | 2            | 4             | 1               | 1                | 1               | 1                | UK has access to large offshore wind resources, though land for solar an issue. Electricity demand for MeOH highest.                                             |
|                                       | Changes to local water supply & security                           | <a href="https://worldwater.io/">https://worldwater.io/</a><br>Consideration of water scarcity within the country compared to amount of water needed for production                                                                    | 0=minimal issues<br>1= low<br>2= moderate<br>3=high<br>4=Significant issue                                                                                                                            | 2            | 3             | 0               | 0                | 0               | 1                | Minimal water needed for Polymers and Minerals, though solar had high water demand per MWh                                                                       |
|                                       | Changes to local electricity supply                                | <a href="https://www.irena.org/Statistics/Statistical-Profiles">https://www.irena.org/Statistics/Statistical-Profiles</a><br>Consideration of amount electricity needed per FU and amount of solar or wind energy produced per country | 0=minimal issues with capacity (or dedicated supply)<br>1= low with capacity<br>2= moderate with capacity<br>3=high with capacity<br>4=Significant issue with capacity                                | 2            | 2             | 0               | 0                | 0               | 0                | MeOH has high electricity demand due to H <sub>2</sub> production.                                                                                               |
|                                       | Changes to local access to material produced                       | <a href="https://comtrade.un.org/">https://comtrade.un.org/</a><br>Consideration of how much methanol is imported and exported                                                                                                         | 0=very high change<br>1= high significant change<br>2= moderate change<br>3=small change<br>4=no change                                                                                               | 2            | 2             | 3               | 3                | 4               | 4                | More methanol is imported than exported, Polyurethane imports and exports are similar and high value, mineral imports are lower value                            |
| <b>Safe &amp; Healthy Living</b>      | Impact on air quality/pollutio                                     | <a href="http://wdi.worldbank.org/table/WV.3">http://wdi.worldbank.org/table/WV.3</a><br>Using the air pollution data per country                                                                                                      | 0= no/positive impact<br>1 = low impact                                                                                                                                                               |              |               |                 |                  |                 |                  | Mineralisation has potential to be carbon negative technology reducing                                                                                           |

|                                        |                                                                            |                                                                                                                                                                                   |                                                                                                                                                                                                                                         |   |   |   |   |   |   |                                                                                                                                                                                                                                                     |
|----------------------------------------|----------------------------------------------------------------------------|-----------------------------------------------------------------------------------------------------------------------------------------------------------------------------------|-----------------------------------------------------------------------------------------------------------------------------------------------------------------------------------------------------------------------------------------|---|---|---|---|---|---|-----------------------------------------------------------------------------------------------------------------------------------------------------------------------------------------------------------------------------------------------------|
| <b>conditions (LC)</b>                 | n levels - production                                                      | and adding possible additional air pollution from process                                                                                                                         | 2 = medium impact<br>3 = high impact<br>4 = very high impact                                                                                                                                                                            |   |   |   |   |   |   | CO <sub>2</sub> levels                                                                                                                                                                                                                              |
|                                        | Utilisation of hazardous substances in process                             | Consideration of the hazards created raw materials used in process, storage and transportation of product. Use of Hazop data for materials.                                       | 0= no impact<br>1 = low impact<br>2 = medium impact<br>3 = high impact<br>4 = very high impact                                                                                                                                          | 2 | 2 | 0 | 0 | 0 | 0 | Use of amines and H <sub>2</sub> (H <sub>2</sub> needs storage) for MeOH. Much lower level of amine needed for polymers and minerals                                                                                                                |
| <b>Promoting social responsibility</b> | Use of wastes and other sustainably materials                              | Consideration of how many raw material as sourced from waste or are sustainable                                                                                                   | 0= very high use of sustainable/wastes<br>1 = high use<br>2 = medium use<br>3 = low use<br>4 = no use/unustainable                                                                                                                      | 1 | 1 | 2 | 2 | 0 | 0 | Mineralisation uses wastes as feedstocks, methanol uses some platinum group metals for electrolysis, polymers use more materials that could be sourced from fossil resources, care needs to be taken to reduce this.                                |
|                                        | Social responsibility in supply chain                                      | Risk of utilisation of illicit or conflict materials within supply chain                                                                                                          | 0= no risk<br>1 = low risk<br>2 = medium risk<br>3 = high risk<br>4 = very high risk                                                                                                                                                    | 1 | 1 | 1 | 1 | 0 | 0 | Metal catalyst and electrode metals have very low possibility of being sourced illicitly or from conflict areas.                                                                                                                                    |
| <b>Consumer health &amp; safety</b>    | Consumer health & safety risk                                              | Consideration as to whether product poses any consumer H&S issues. Data from COSHH                                                                                                | 0= no risk<br>1 = low risk<br>2 = medium risk<br>3 = high risk<br>4 = very high risk                                                                                                                                                    | 2 | 2 | 0 | 0 | 0 | 0 | Methanol predominantly used in industry rather than by consumers, however poses acute health hazards for oral , dermal and inhalation toxicity and is highly flammable                                                                              |
| <b>EOL responsibility</b>              | Recyclability of product & process elements                                | Consideration of raw materials, wastes and products in respect to their ability to be recycled. Consideration of ease of recycling.                                               | 0= no impact/ easily fully recyclable<br>1 = low impact/some issues recycling<br>2 = medium impact/ recycling + end of life pyrolysis/energy recovery<br>3 = high impact/ recycling via DAC<br>4 = very high impact/ cannot be recycled | 3 | 3 | 2 | 2 | 0 | 0 | Methanol is not a product able to be recycled directly is going to emit CO <sub>2</sub> , can be recycled by air capture of CO <sub>2</sub> . Polymers recycled until end of life. Minerals do not need recycling, though can be crushed and reused |
|                                        | Potential health risks for improper disposal of product & process elements | Potential impact on health, data from knowledge of process elements and product disposal.                                                                                         | 0= no impact<br>1 = low impact<br>2 = medium impact<br>3 = high impact<br>4 = very high impact                                                                                                                                          | 1 | 1 | 0 | 0 | 0 | 0 | No issues for product disposal, high use of electrolyzers for H <sub>2</sub> = disposal of used electrodes                                                                                                                                          |
| <b>Child labour</b>                    | Potential for utilization of child labour in supply chain                  | <a href="http://wdi.worldbank.org/table/2.6">http://wdi.worldbank.org/table/2.6</a><br>Likelihood that their might be child labour occurring in supply chain and scenario country | 0= no likelihood<br>1 = low likelihood<br>2 = medium likelihood<br>3 = high likelihood<br>4 = very high likelihood                                                                                                                      | 1 | 1 | 0 | 0 | 0 | 0 | MeOH uses high level of catalyst/rare metals which can be sourced from areas using child labour                                                                                                                                                     |
| <b>Forced labour</b>                   | Potential for utilization of                                               | <a href="https://ilostat.ilo.org/">https://ilostat.ilo.org/</a>                                                                                                                   | 0= no likelihood<br>1 = low likelihood                                                                                                                                                                                                  |   |   |   |   |   |   | MeOH uses high level of catalyst/rare metals which can be sourced from                                                                                                                                                                              |

|                                                   |                                                                   |                                                                                                                                                                                                                                                                                                                                                     |                                                                                                                    |   |   |   |   |   |   |                                                                                                                                                             |
|---------------------------------------------------|-------------------------------------------------------------------|-----------------------------------------------------------------------------------------------------------------------------------------------------------------------------------------------------------------------------------------------------------------------------------------------------------------------------------------------------|--------------------------------------------------------------------------------------------------------------------|---|---|---|---|---|---|-------------------------------------------------------------------------------------------------------------------------------------------------------------|
|                                                   | forced labour in supply chain                                     | <a href="http://ilo.org/wcmsp5/groups/public/@dgr_eports/@dcomm/documents/publication/wcms_575479.pdf">http://ilo.org/wcmsp5/groups/public/@dgr_eports/@dcomm/documents/publication/wcms_575479.pdf</a>                                                                                                                                             | 2 = medium likelihood<br>3 = high likelihood<br>4 = very high likelihood                                           |   |   |   |   |   |   | areas using forced labour                                                                                                                                   |
| <b>Equal Opportunities</b>                        | Potential for supporting discriminatory practices in supply chain | Labour force participation rate in the country. Data from World Bank regarding employment in location.                                                                                                                                                                                                                                              | 0= no likelihood<br>1 = low likelihood<br>2 = medium likelihood<br>3 = high likelihood<br>4 = very high likelihood | 1 | 1 | 1 | 1 | 0 | 0 | Not likely in UK however could play a factor within supply chain of metals for catalysts                                                                    |
| <b>Worker health &amp; safety</b>                 | Worker health & safety risk                                       | Country H&S data and consideration of process<br><a href="https://ilostat.ilo.org/topics/safety-and-health-at-work/">https://ilostat.ilo.org/topics/safety-and-health-at-work/</a>                                                                                                                                                                  | 0= no impact<br>1 = low impact<br>2 = medium impact<br>3 = high impact<br>4 = very high impact                     | 2 | 2 | 1 | 1 | 1 | 1 | H <sub>2</sub> storage & transportation and possible exposure to amines are biggest issues regarding H&S for MeOH.                                          |
| <b>Public commitment to sustainability issues</b> |                                                                   | Irena Energy profiles, commitment to renewable energy targets and frequency of environmental policy<br><a href="http://solability.com/the-global-sustainable-competitiveness-index/the-index">http://solability.com/the-global-sustainable-competitiveness-index/the-index</a><br><a href="https://www.sdgindex.org/">https://www.sdgindex.org/</a> | 0= very high<br>1 = high commitment<br>2 = medium commitment<br>3 = low commitment<br>4 = no commitment            | 1 | 1 | 2 | 2 | 1 | 1 | MeOH could be included in renewable energy targets and help with grid balancing, mineralisation can count towards net zero targets as a carbon dioxide sink |
| <b>Prevention &amp; mitigation of conflicts</b>   | Potential for utilisation of goods/materials /services            | Consideration of sources of raw materials for the process. Are these from areas with conflict or could alternative sourcing contribute to mitigation?                                                                                                                                                                                               | 0= no impact<br>1 = low impact<br>2 = medium impact<br>3 = high impact<br>4 = very high impact                     | 1 | 1 | 0 | 0 | 0 | 0 | High level of catalyst used for MeOH which may be sourced from unstable regions.                                                                            |
| <b>Contribution to economic development</b>       | Use of local supply chain                                         | How many raw materials can be sourced local reducing demand for imports and therefore increasing local economy.                                                                                                                                                                                                                                     | 0= very high use<br>1 = high use<br>2 = medium use<br>3 = low use<br>4 = no use                                    | 1 | 1 | 2 | 2 | 0 | 0 | Mineralisation recycles waste products, MeOH predominantly local supply chain though catalysts not local, PO may be externally sourced for polymers         |

## Notes and references

- 1 T. Kuramochi, A. Ramírez, W. Turkenburg and A. Faaij, *Prog. Energy Combust. Sci.*, 2012, **38**, 87–112.
- 2 X. Zhang, B. Singh, X. He, T. Gundersen, L. Deng and S. Zhang, *Int. J. Greenh. Gas Control*, 2014, **27**, 289–298.
- 3 M. Pérez-Fortes, J. C. Schöneberger, A. Boulamanti and E. Tzimas, *Appl. Energy*, 2016, **161**, 718–732.
- 4 A. Evans, V. Strezov and T. J. Evans, *Renew. Sustain. Energy Rev.*, 2009, **13**, 1082–1088.

- 5 C. Fernández-Dacosta, M. Van Der Spek, C. R. Hung, G. D. Oregionni, R. Skagestad, P. Parihar, D. T. Gokak, A. H. Strømman and A. Ramirez, *J. CO2 Util.*, 2017, **21**, 405–422.
- 6 A. Di Maria, R. Snellings, L. Alaert, M. Quaghebeur and K. Van Acker, *Int. J. Greenh. Gas Control*, 2020, **93**, 102882.
- 7 G. B. Frisvold and T. Marquez, *J. Contemp. Water Res. Educ.*, 2013, **151**, 106–116.
- 8 S. Shiva Kumar and V. Himabindu, *Mater. Sci. Energy Technol.*, 2019, **2**, 442–454.
